# Supplementary material for: e-Methanation with a spiral catalyst: optimized thermal management and long-term stability
Source: Royal Society of Chemistry journal article supplement (doi:10.1039/d4ra08236b), 2025-01-01

## Supporting information

**Title: *e*-Methanation with a spiral catalyst: optimized thermal management and long-term stability**

**Authors: Ryo Watanabe<sup>a,\*</sup>, Kohki Nishide<sup>a</sup>, Hiroyasu Suganuma<sup>a</sup>, Priyanka Verma<sup>b</sup>, Hiroshi Akama<sup>a</sup>, Choji Fukuhara<sup>a</sup>**

<sup>a</sup> *Department of Applied Chemistry and Biochemical Engineering, Graduate School of Engineering, Shizuoka University, 3-5-1 Johoku, Chuo-ku, Hamamatsu, Shizuoka 432-8561*

<sup>b</sup> *Department of Chemistry, Indian Institute of Technology Delhi, Hauz Khas, New Delhi – 110016, India*

Figure S-1 Adsorption-Desorption Isotherms of as-prepared spiral-type Ru/CeO<sub>2</sub> catalyst.

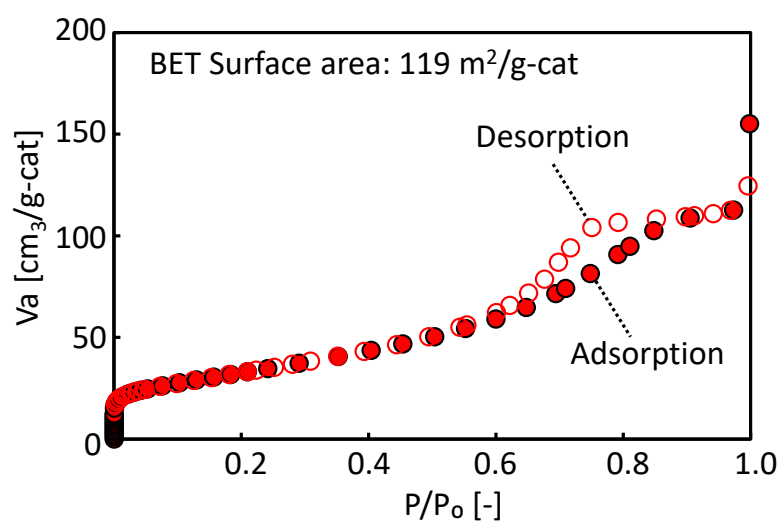

Figure S-2 Effect of twist angle differences in spiral-shaped catalysts on reaction field temperature distribution evaluated by IR thermal imaging.

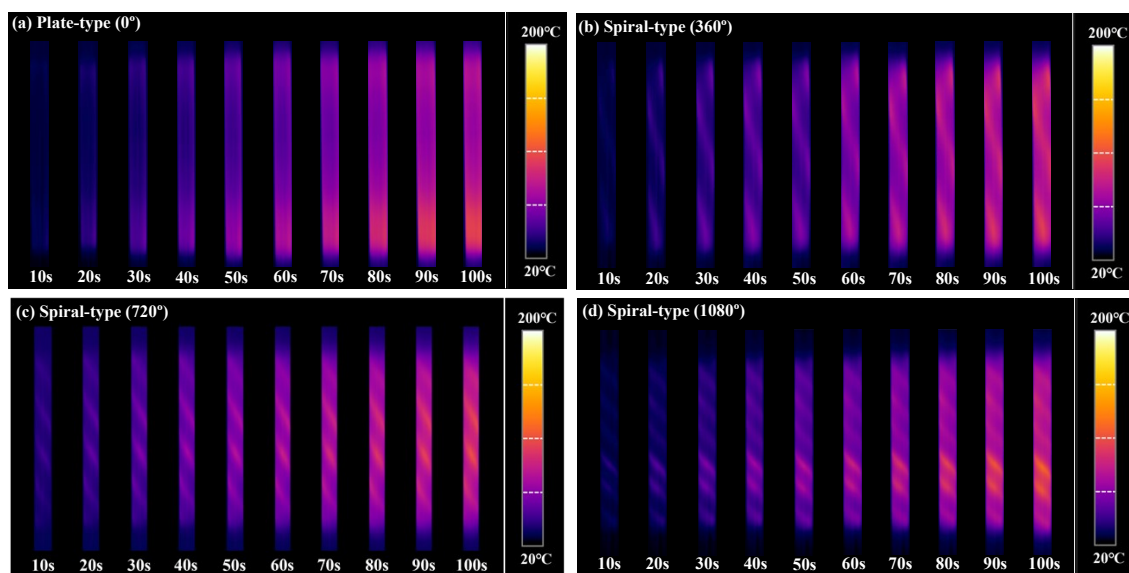

Figure S-3 XRD patterns of spiral-type structured Ru/CeO<sub>2</sub> catalyst before and after reaction.

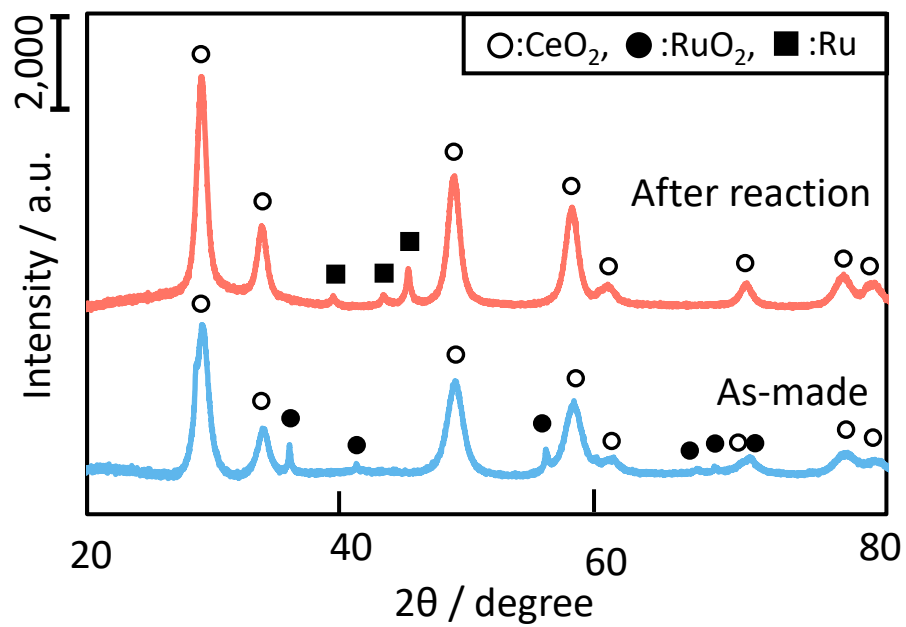

Supplement: d4ra08236b1.pdf [file d4ra08236b1.pdf]
